# INFOGRAPHICS IN ANESTHESIOLOGY

Complex Information for Anesthesiologists Presented Quickly and Clearly

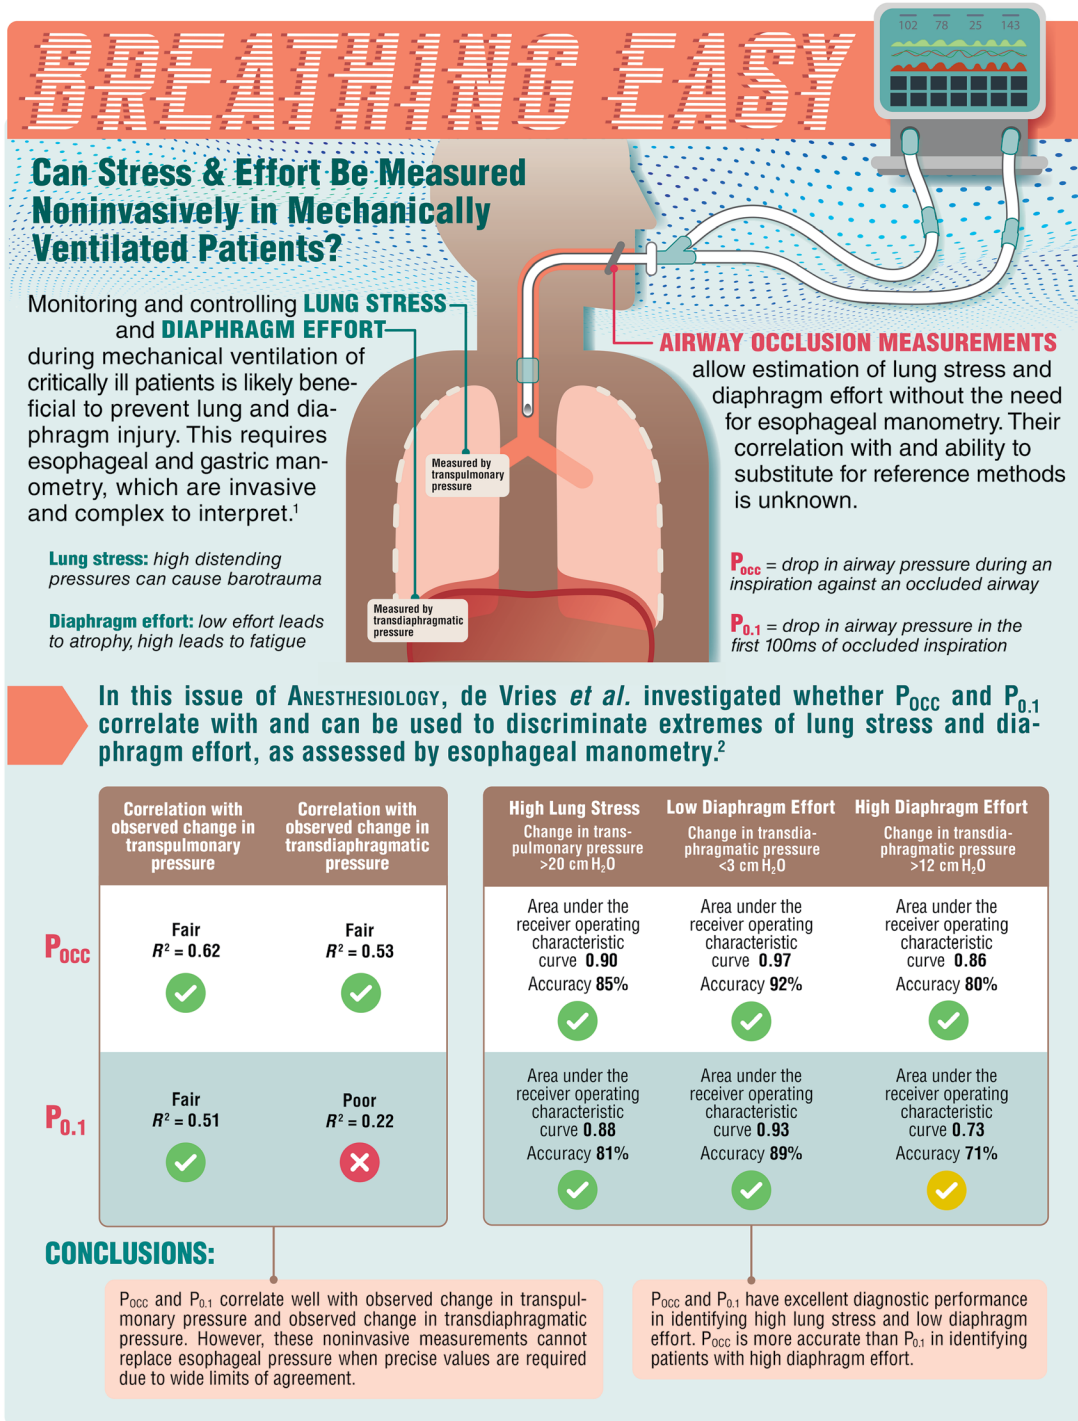

Downloaded from <http://asa2.silverchair.com/anesthesiology/article-pdf/138/3/A17681972/20230300-0-000005.pdf> by guest on 19 April 2024

Infographic created by Holly B. Ende, Vanderbilt University Medical Center; James P. Rathmell, Brigham and Women's Health Care/Harvard Medical School; and Jonathan P. Wanderer, Vanderbilt University Medical Center. Illustration by Annemarie Johnson, Vivo Visuals Studio. Address correspondence to Dr. Ende: [holly.ende@vumc.org](mailto:holly.ende@vumc.org).

- Dianti J, Goligher EC: Monitoring respiratory effort and lung-distending pressure noninvasively during mechanical ventilation: Ready for prime time. *ANESTHESIOLOGY* 2023; 138:235–7
- de Vries HJ, Tuinman PR, Jonkman AH, Liu L, Qiu H, Girbes ARJ, Zhang YR, de Man AME, de Groot H-J, Heunks L: Performance of noninvasive airway occlusion maneuvers to assess lung stress and diaphragm effort in mechanically ventilated critically ill patients. *ANESTHESIOLOGY* 2023; 138:274–88
